# Supplementary material for: Quantifying Tip60 (Kat5) stratifies breast cancer
Source: PubMed Central journal article supplement (PMC6405843; doi:10.1038/s41598-019-40221-5), 2019-03-07

## **Quantifying Tip60 (Kat5) stratifies breast cancer.**

**Authors:** McGuire A<sup>1</sup>, Casey MC<sup>1</sup>, Shalaby A<sup>2</sup>, Kalinina O<sup>3</sup>, Curran C<sup>1</sup>, Webber M<sup>2</sup>, Callagy G<sup>2</sup>, Holian E<sup>3</sup>, Bourke E<sup>2</sup>, Kerin MJ<sup>1</sup>, Brown JA<sup>1</sup>  $\phi^*$

### **Supplemental figures and legends.**

**Supplemental Figure 1. A.** Tip60 IHC staining in Control cell line (MCF10A) and indicated Breast Cancer Cell lines. Left, full size image; Right, 5x magnification. Blue: DNA counter stain, Orange/Brown: Tip60 staining. **B.** IHC Negative control. Staining performed using Tip60 antibody PAB18305 (Abnova).

**Supplemental Figure 2.** Additional examples of Tip60 IHC staining in breast tumour samples (Supplementary to Figure 2B). Image Pairs: Top image: full stained TMA. Bottom image: 12x magnification of tumour. Blue: DNA stain, Orange/Brown: Tip60 staining (Tip60 antibody K-17: sc-5727, Santa Cruz).

**Supplemental Figure 3.** Tip60 staining of invasive breast cancer tumour with second Tip60 antibody (Abnova). Blue: DNA stain, Orange/Brown: Tip60 staining. Staining performed using Tip60 antibody PAB18305 (Abnova).

**Supplemental Figure 4. A.** Tip60 staining patterns observed in TMA (percent). **B.** Tip60 staining patterns by percent of Luminal A cohort.

**Supplemental Figure 5. A.** Tip60 staining patterns observed, by tumour grade. **B.** Tip60 staining patterns observed, by Union for International Cancer Control (UICC) tumour stage.

**Supplemental Figure 6. A.** Tip60 staining patterns observed by ER positivity. **B.** Percent of cytoplasmic only Tip60 staining, ER positivity.

**Supplemental Figure 7. A.** Tip60 staining patterns observed by PR positivity. **B.** Nuclear Tip60 staining positivity by PR status.

**Supplemental Figure 8. A.** Nuclear Tip60 staining positivity by menopausal status.

**Supplemental Figure 9. A.** Univariate complete-case Cox proportional hazard (CPH) regression modeling association with: **A.** Subtype (n=227). **B.** Tumour size. **C.** Stage (n=296). **D.** Age.

**Supplemental Figure 10. A.** Complete-case CPH modeling (n=185) of OS and Cyto-Only percentage. **B.** Imputed-data CPH modeling for OS using Subtype, Stage and Age (n=334). **C.** Complete-case CPH modeling for DFS (n=174) using Cyto-Only percentage, Total Cyto percentage, Nuc, Subtype, NPI, Stage, and Menopause status explain variability in DFS outcome.

**Supplemental Figure 11. A.** Allelic changes observed (change, % and n indicated) in Kat5 gene in breast cancer cases. Using cBioPortal with individual Breast cancer studies indicated. **B.** Tip60 mutations observed in breast cancer, in cBioPortal.

A

MCF10A

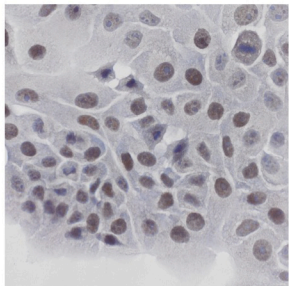20  $\mu$ M

x5

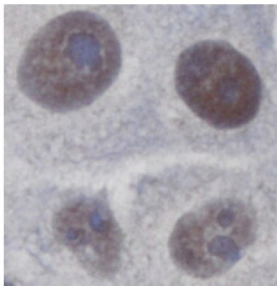10  $\mu$ M

MCF7

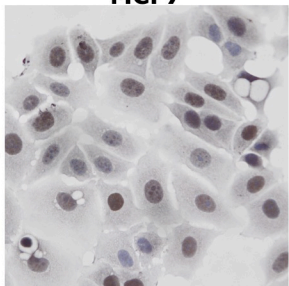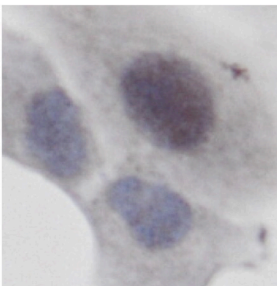

MDA MB 231

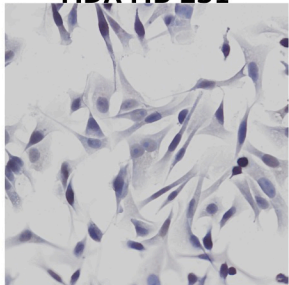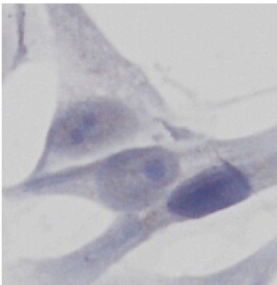

BT474

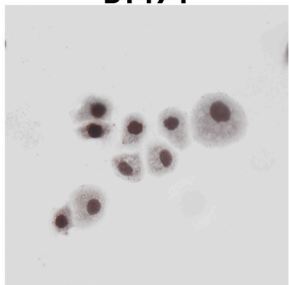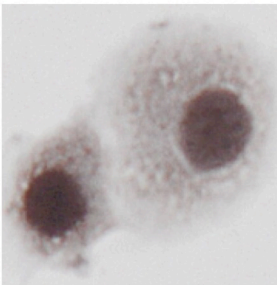

B

**Negative Control**  
**2<sup>nd</sup>ry antibody alone**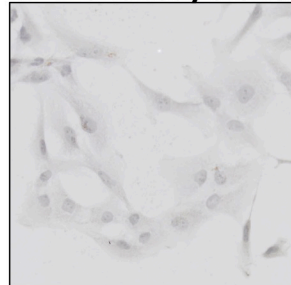

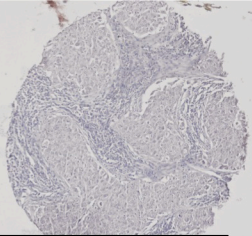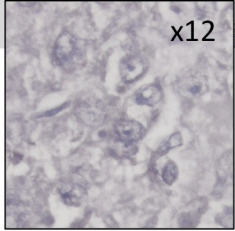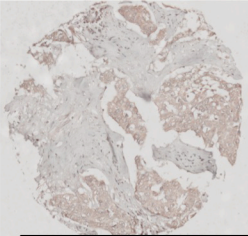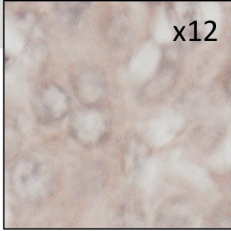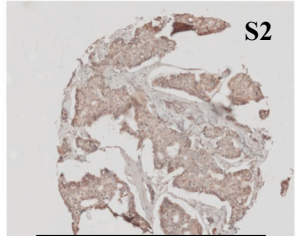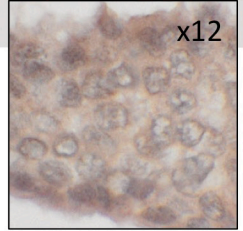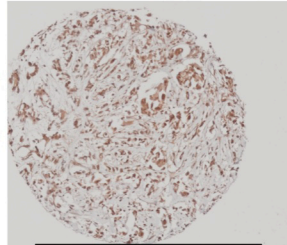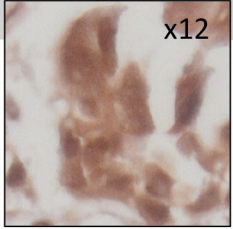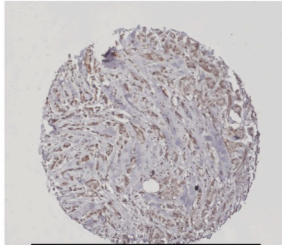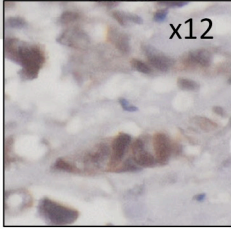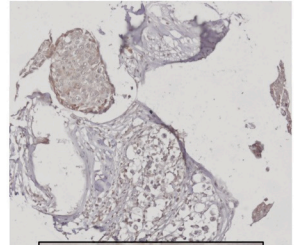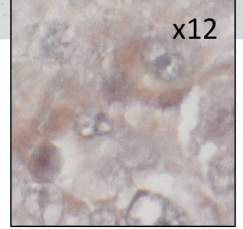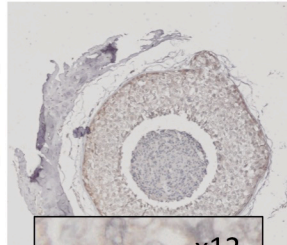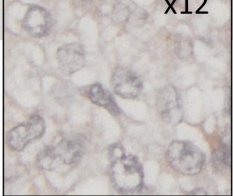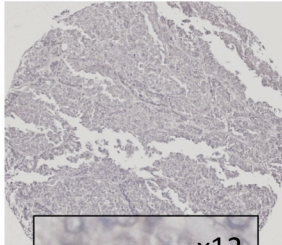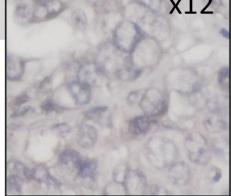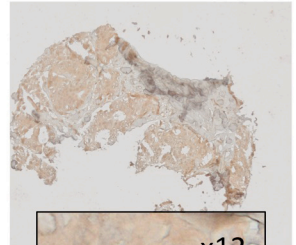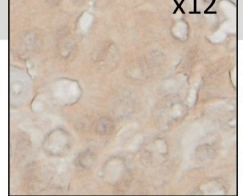

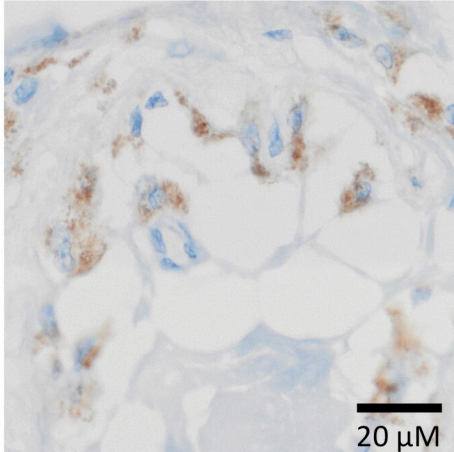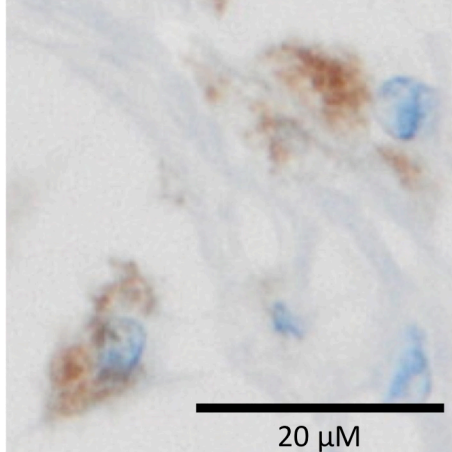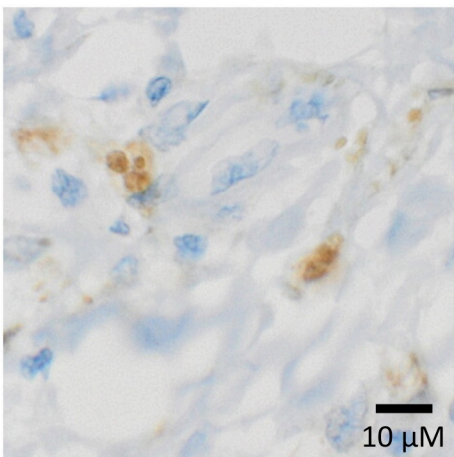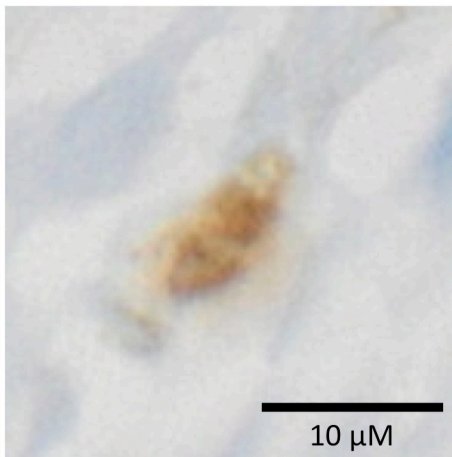

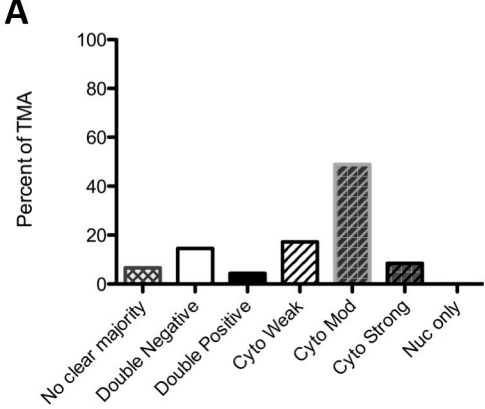

Tip60 Staining pattern- majority of cells in section

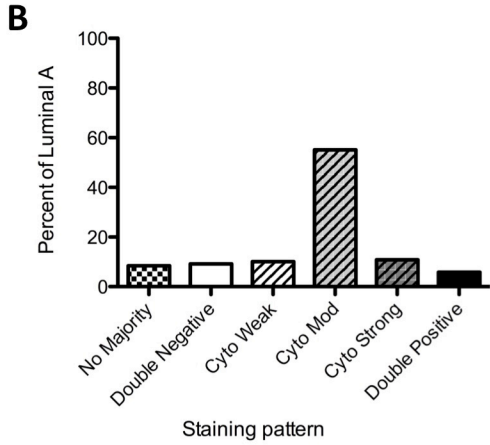

**A**

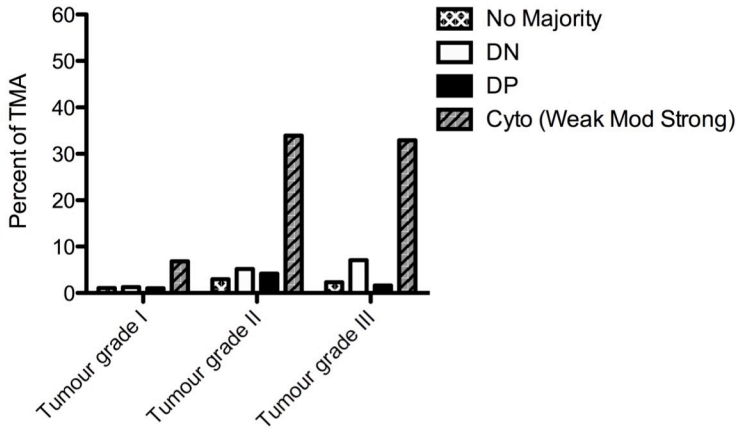

Majority staining pattern by Tumour Grade

**B**

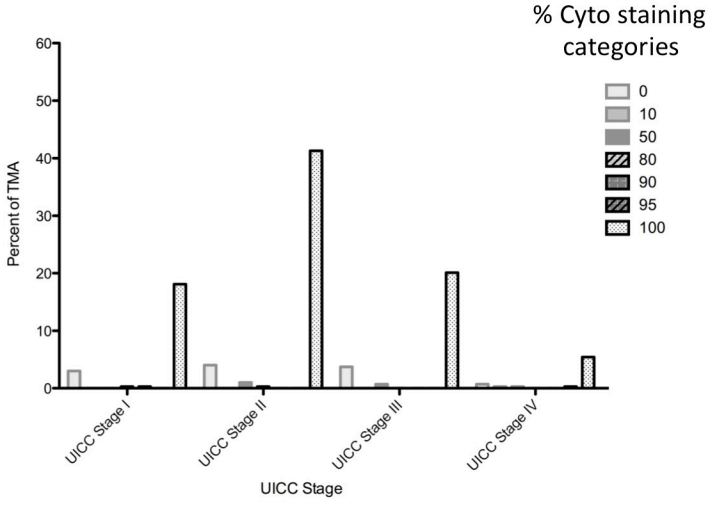



**A**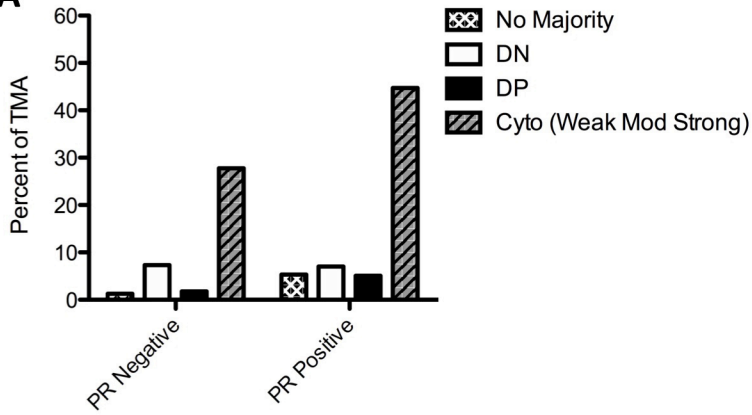

Majority staining pattern by PR status

**B**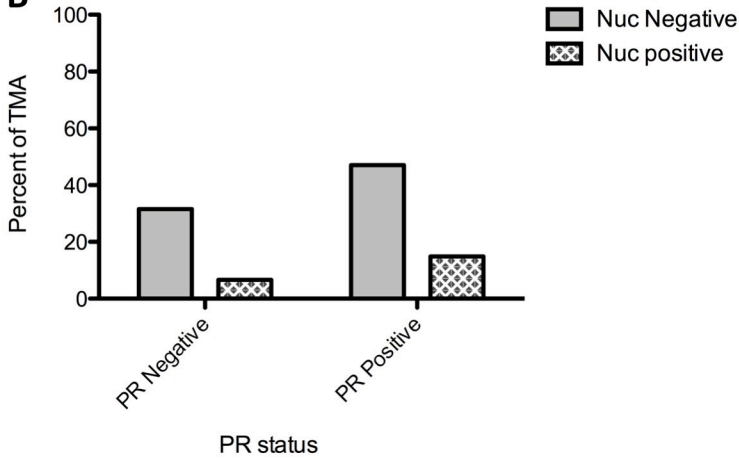

PR status



**A****S8**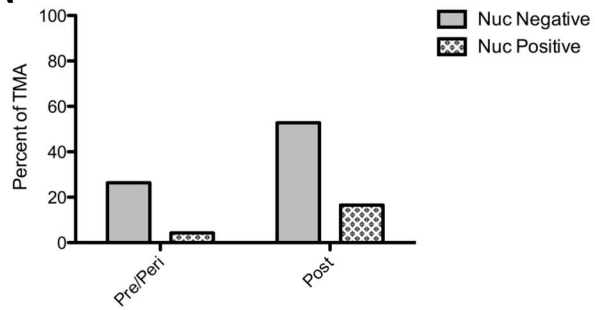

Nuclear staining pattern by menopausal status

**A**

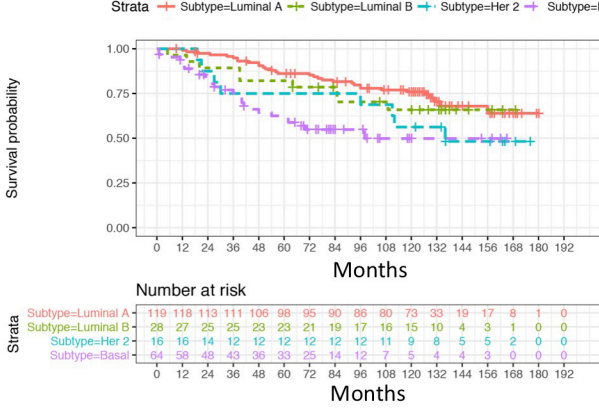

**B**

| Overall Survival Time                    |                            |
|------------------------------------------|----------------------------|
|                                          | HR( 95 perc CI)            |
| Tumour.Size                              | 1.020***<br>(1.011, 1.029) |
| Observations                             | 316                        |
| <i>Note:</i> *p<0.1; **p<0.05; ***p<0.01 |                            |

**C**

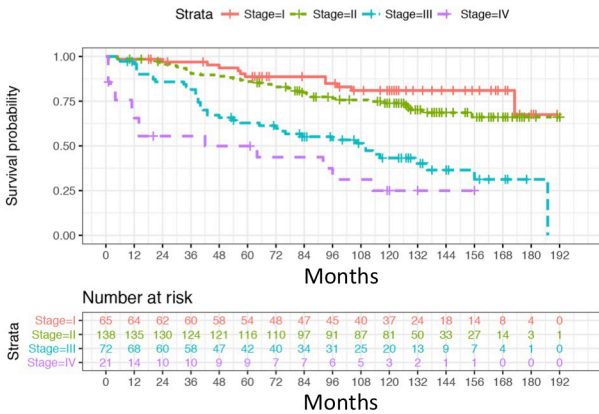

**D**

| Overall Survival Time                    |                            |
|------------------------------------------|----------------------------|
|                                          | HR( 95 perc CI)            |
| Age                                      | 1.039***<br>(1.025, 1.054) |
| Observations                             | 334                        |
| <i>Note:</i> *p<0.1; **p<0.05; ***p<0.01 |                            |

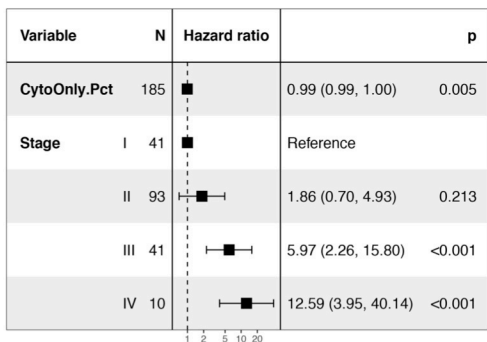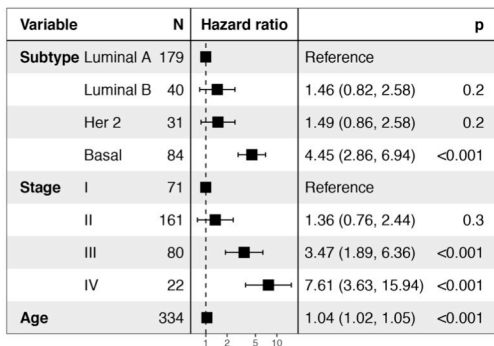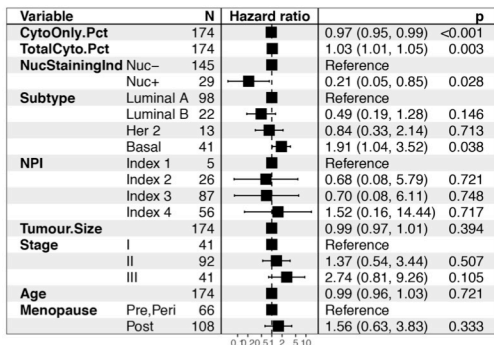

A

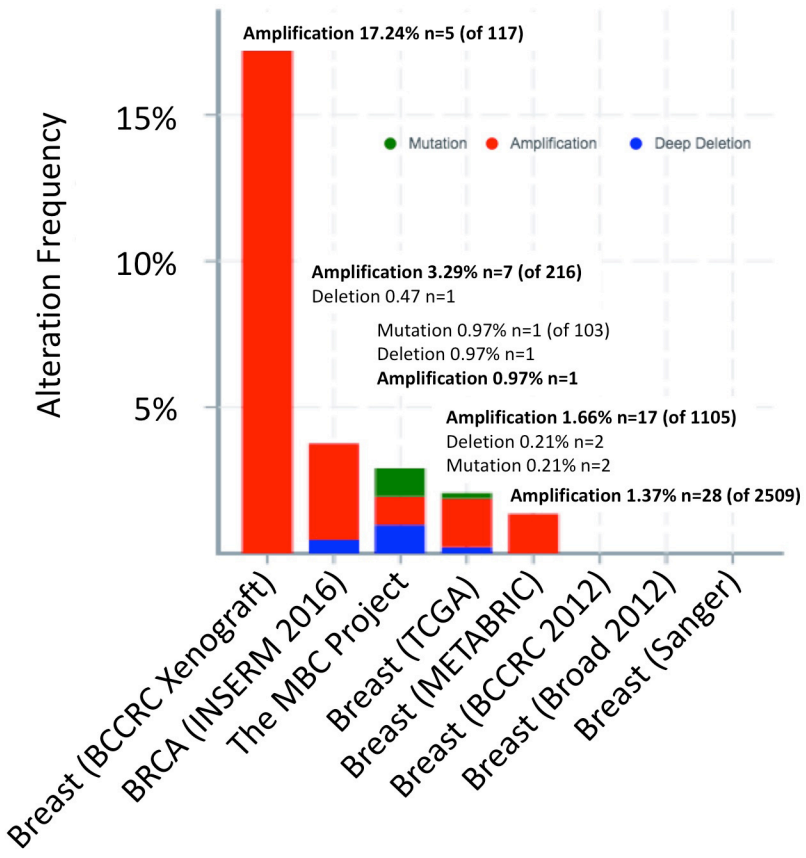

B

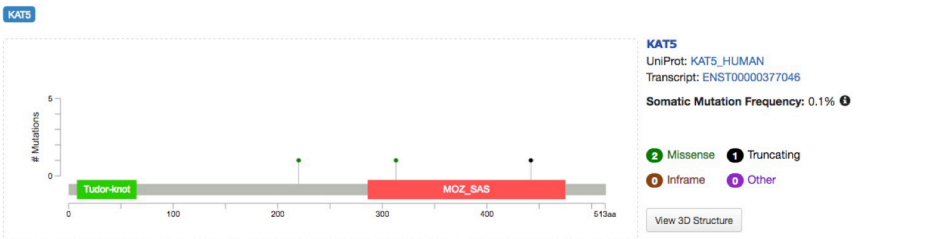

3 Mutations (page 1 of 1)

| Study               | Sample ID           | Protein Change | Annotation | Mutation Type | Copy #     | COSMIC | Allele Freq (T) | # Mut in Sample |
|---------------------|---------------------|----------------|------------|---------------|------------|--------|-----------------|-----------------|
| The Metastatic B... | MBC-MBCProject_5... | S313F          | ○          | Missense      | Gain       |        |                 | 694             |
| Breast Invasive ... | TCGA-A2-A0D1-01     | R220Q          | ○          | Missense      | Diploid    |        | 0.21            | 58              |
| Breast Invasive ... | TCGA-BH-A18P-01     | X442_splice    | ○          | Splice        | ShallowDel |        | 0.38            | 271             |

MDA MB 231  
MDA MB 468  
MCF7  
T47D  
SK-BR3  
+ ve control

Tip60

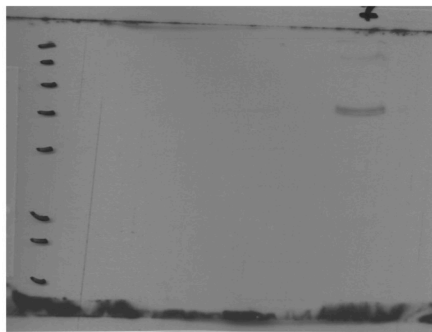

$\beta$ -Tubulin

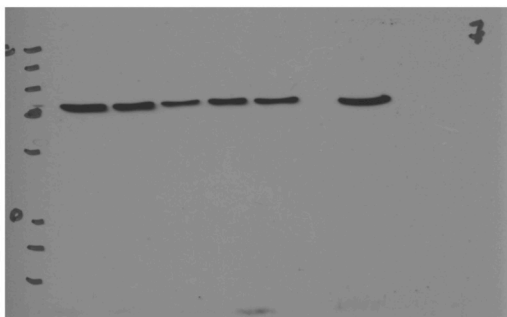

Supplement: 41598_2019_40221_MOESM1_ESM.pdf [file 41598_2019_40221_MOESM1_ESM.pdf]
